# Supplementary material for: Criteria-based curation of a therapy-focused compendium to support treatment recommendations in precision oncology
Source: PubMed Central journal article supplement (PMC8222322; doi:10.1038/s41698-021-00194-z), 2021-06-23
Supplement: 41698_2021_194_MOESM1_ESM.pdf [file 41698_2021_194_MOESM1_ESM.pdf]

## Criteria-based curation of a therapy-focused compendium to support treatment recommendations in precision oncology

Frank P. Lin <sup>1,2,3,\*</sup>, Subotheni Thavaneswaran <sup>2,3,4</sup>, John P. Grady <sup>3,4</sup>, Mandy Ballinger <sup>3,4</sup>, Maya Kansara <sup>3,4</sup>, Samantha R. Oakes <sup>3,4</sup>, Jayesh Desai <sup>5</sup>, Chee Khoon Lee <sup>2,6</sup>, John Simes <sup>2</sup>, David M. Thomas <sup>3,4,\*</sup>

1. Kinghorn Centre for Clinical Genomics, Garvan Institute of Medical Research, Sydney, NSW, Australia
2. NHMRC Clinical Trial Centre, University of Sydney, Sydney, NSW, Australia
3. St Vincent's Clinical School, Faculty of Medicine, UNSW Sydney, NSW, Australia
4. The Kinghorn Cancer Centre, Garvan Institute of Medical Research, Sydney, NSW, Australia
5. Department of Medical Oncology, Peter MacCallum Cancer Centre, Melbourne, VIC, Australia
6. Department of Medical Oncology, St George Hospital, Kogarah, NSW, Australia

**Supplementary Table 1:** An excerpt from TOPOGRAPH showing differential tiering of tumour mutational burden as a predictive biomarker for immune checkpoint inhibitors.

| Tier | Biomarker | Alteration | Cancer type                                                                                                                                             | Therapy                   | Comments                                                                                                                                                                                                       |
|------|-----------|------------|---------------------------------------------------------------------------------------------------------------------------------------------------------|---------------------------|----------------------------------------------------------------------------------------------------------------------------------------------------------------------------------------------------------------|
| 2    | TMB       | High       | Cervical cancer<br>Endometrial cancer<br>Neuroendocrine tumour<br>Salivary gland carcinoma<br>Small-cell lung cancer<br>Thyroid cancer<br>Vulvar cancer | Pembrolizumab             | Not TGA approved. FDA approved. In Phase 2 KEYNOTE-158 trial, the following cancer types have higher response rate in TMB high group compared to non-TMB-H groups.                                             |
| 2    | TMB       | High       | Non-small cell lung cancer                                                                                                                              | Nivolumab + Ipilimumab    | Not TGA approved. Phase 3 CHECKMATE 227. Prespecified, prospective TMB cutoff of 10mut/MB in 57% of cohort. Median PFS: 7.2 vs 5.5 months. Quantitative TMB is not correlated with TMB.                        |
| 3    | TMB       | High       | Non-small cell lung cancer                                                                                                                              | Durvalumab + Tremelimumab | Pre-planned exploratory biomarker analysis from the Phase 3 MYSTIC trial.                                                                                                                                      |
| 3    | TMB       | High       | Solid tumours except Colorectal Cancer                                                                                                                  | Pembrolizumab             | Overall Tier 3 based on phase 2 KEYNOTE-158 trial, forming the basis of FDA pan-cancer approval noted. In overall cohort, TMB-H (v non-TMB-H) was noted to have an objective response rate of 29% (versus 6%). |
| 4    | TMB       | High       | Colorectal Cancer                                                                                                                                       | Pembrolizumab             | Microsatellite-stable colorectal cancers were not included/reported in KEYNOTE-158.                                                                                                                            |
| 4    | TMB       | High       | Non-small cell lung cancer                                                                                                                              | Nivolumab                 | Exploratory analysis from Checkmate 026.                                                                                                                                                                       |
| 4    | TMB       | High       | Gastric cancer                                                                                                                                          | Toripalimab               | Exploratory analysis showed ORR 33% v 6% at TMB threshold of 12/MB                                                                                                                                             |

Abbreviations TMB: Tumour Mutational Burden.

**Supplementary Table 2.** Summary of biomarkers and therapies curated in TOPOGRAPH by tiers

| Item                                                      | Total       | T1-4        | Tier 1A        | Tier 1B       | Tier 2          | Tier 3          | Tier 4          | Tier 1/2        | Tier 3/4         | Tier R1       | Tier R2         |
|-----------------------------------------------------------|-------------|-------------|----------------|---------------|-----------------|-----------------|-----------------|-----------------|------------------|---------------|-----------------|
|                                                           | N           | N           | N (%)*         | N (%)         | N (%)           | N (%)           | N (%)           | N (%)           | N (%)            | N (%)†        | N (%)           |
| <b>1. Biomarkers</b>                                      |             |             |                |               |                 |                 |                 |                 |                  |               |                 |
| <b>Number of biomarkers</b>                               | 199         | 178         | 24 (13)        | 33 (19)       | 43 (24)         | 49 (28)         | 146 (82)        | 61 (34)         | 158 (89)         | 9 (5)         | 76 (38)         |
| <b>Number of unique biomarkers by type of alterations</b> |             |             |                |               |                 |                 |                 |                 |                  |               |                 |
| Simple mutations                                          | 463         | 284         | 10 (4)         | 8 (3)         | 93 (33)         | 91 (32)         | 143 (50)        | 100 (35)        | 211 (74)         | 30 (6)        | 268 (58)        |
| Variant groups                                            | 181         | 156         | 4 (3)          | 6 (4)         | 19 (12)         | 38 (24)         | 127 (81)        | 22 (14)         | 149 (96)         | 3 (2)         | 34 (19)         |
| Protein expressions                                       | 68          | 59          | 9 (15)         | 12 (20)       | 12 (20)         | 9 (15)          | 40 (68)         | 21 (36)         | 44 (75)          | -             | 11 (16)         |
| Amplification/deletions                                   | 42          | 33          | 1 (3)          | 1 (3)         | 3 (9)           | 3 (9)           | 31 (94)         | 3 (9)           | 32 (97)          | -             | 24 (57)         |
| Fusion/rearrangements                                     | 48          | 43          | 5 (12)         | 10 (23)       | 17 (40)         | 9 (21)          | 22 (51)         | 25 (58)         | 26 (60)          | -             | 8 (17)          |
| Splice variants                                           | 2           | 2           | -              | -             | -               | -               | 2 (100)         | -               | 2 (100)          | -             | 1 (50)          |
| Gene methylations                                         | 5           | 5           | 1 (20)         | -             | -               | -               | 4 (80)          | 1 (20)          | 4 (80)           | -             | -               |
| Germline mutations                                        | 9           | 9           | 4 (44)         | 2 (22)        | 3 (33)          | 5 (56)          | 3 (33)          | 5 (56)          | 7 (78)           | -             | 2 (22)          |
| Combination markers                                       | 63          | 45          | 2 (4)          | 2 (4)         | 3 (7)           | 9 (20)          | 30 (67)         | 6 (13)          | 39 (87)          | -             | 22 (35)         |
| Complex biomarkers                                        | 6           | 6           | -              | 3 (50)        | 5 (83)          | 2 (33)          | 4 (67)          | 6 (100)         | 4 (67)           | -             | -               |
| <b>All alterations</b>                                    | <b>887</b>  | <b>642</b>  | <b>36 (6)</b>  | <b>44 (7)</b> | <b>155 (24)</b> | <b>166 (26)</b> | <b>406 (63)</b> | <b>189 (29)</b> | <b>518 (81)</b>  | <b>33 (4)</b> | <b>370 (42)</b> |
| <b>2. Cancer types</b>                                    |             |             |                |               |                 |                 |                 |                 |                  |               |                 |
| <b>Unique cancer types</b>                                | 106         | 105         | 30 (29)        | 26 (25)       | 46 (44)         | 46 (44)         | 56 (53)         | 64 (61)         | 78 (74)          | 6 (6)         | 32 (30)         |
| Common                                                    | 17          | 17          | 8 (47)         | 7 (41)        | 10 (59)         | 11 (65)         | 15 (88)         | 11 (65)         | 16 (94)          | 2 (12)        | 12 (71)         |
| Less common                                               | 16          | 16          | 5 (31)         | 4 (25)        | 9 (56)          | 12 (75)         | 9 (56)          | 10 (62)         | 15 (94)          | -             | 3 (19)          |
| Rare                                                      | 73          | 72          | 17 (24)        | 15 (21)       | 27 (37)         | 23 (32)         | 32 (44)         | 43 (60)         | 47 (65)          | 4 (5)         | 17 (23)         |
| <b>3. Therapies</b>                                       |             |             |                |               |                 |                 |                 |                 |                  |               |                 |
| <b>Number of therapies</b>                                | 373         | 345         | 55 (16)        | 37 (11)       | 65 (19)         | 92 (27)         | 219 (63)        | 130 (38)        | 271 (79)         | 15 (4)        | 118 (32)        |
| <b>Number of unique therapies by cancer type</b>          |             |             |                |               |                 |                 |                 |                 |                  |               |                 |
| Histotype agnostic                                        | 130         | 117         | 1 (1)          | 3 (3)         | -               | 3 (3)           | 114 (97)        | 4 (3)           | 115 (98)         | 2 (2)         | 33 (25)         |
| Breast cancer                                             | 83          | 72          | 16 (22)        | 11 (15)       | 11 (15)         | 13 (18)         | 30 (42)         | 38 (53)         | 41 (57)          | -             | 29 (35)         |
| Lung cancer (NSCLC)                                       | 82          | 72          | 9 (12)         | 4 (6)         | 11 (15)         | 33 (46)         | 45 (62)         | 19 (26)         | 65 (90)          | 5 (6)         | 32 (39)         |
| Colorectal cancer                                         | 30          | 24          | 3 (12)         | 1 (4)         | 4 (17)          | 9 (37)          | 11 (46)         | 8 (33)          | 18 (75)          | 3 (10)        | 13 (43)         |
| Gastric/GOJ cancers                                       | 22          | 17          | 2 (12)         | -             | 3 (18)          | 4 (24)          | 9 (53)          | 5 (29)          | 12 (71)          | -             | 6 (27)          |
| Glioma, meningioma                                        | 21          | 18          | 2 (11)         | -             | 2 (11)          | 2 (11)          | 14 (78)         | 3 (17)          | 16 (89)          | -             | 3 (14)          |
| Ovarian and peritoneal                                    | 21          | 21          | 1 (5)          | 2 (10)        | 4 (19)          | 2 (10)          | 18 (86)         | 5 (24)          | 19 (90)          | -             | -               |
| Urothelial cancer                                         | 19          | 18          | 1 (6)          | 2 (11)        | 3 (17)          | 2 (11)          | 11 (61)         | 6 (33)          | 13 (72)          | -             | 2 (11)          |
| Prostate cancer                                           | 18          | 9           | -              | -             | 3 (33)          | 1 (11)          | 7 (78)          | 3 (33)          | 8 (89)           | -             | 11 (61)         |
| Cutaneous Melanoma                                        | 16          | 14          | 4 (29)         | 1 (7)         | 2 (14)          | 4 (29)          | 5 (36)          | 7 (50)          | 8 (57)           | -             | 6 (37)          |
| Pancreatic cancer                                         | 14          | 13          | 2 (15)         | -             | 2 (15)          | 1 (8)           | 8 (62)          | 4 (31)          | 9 (69)           | -             | 2 (14)          |
| Sarcomas                                                  | 14          | 12          | -              | 1 (8)         | 2 (17)          | 2 (17)          | 9 (75)          | 3 (25)          | 10 (83)          | -             | 2 (14)          |
| Endometrial & uterine                                     | 13          | 13          | 1 (8)          | 1 (8)         | 1 (8)           | 6 (46)          | 4 (31)          | 3 (23)          | 10 (77)          | -             | -               |
| Acute lymphoblastic leukaemia                             | 11          | 11          | 5 (45)         | -             | 6 (55)          | 1 (9)           | 3 (27)          | 8 (73)          | 4 (36)           | 4 (36)        | -               |
| Gastrointestinal stromal tumours                          | 11          | 10          | 3 (30)         | 1 (10)        | 6 (60)          | 2 (20)          | 2 (20)          | 7 (70)          | 4 (40)           | 2 (18)        | 7 (64)          |
| Biliary tract cancers                                     | 10          | 9           | -              | -             | 2 (22)          | 4 (44)          | 3 (33)          | 2 (22)          | 7 (78)           | -             | 3 (30)          |
| Chronic Myelogenous leukaemia                             | 6           | 6           | 4 (67)         | 1 (17)        | 5 (83)          | 1 (17)          | -               | 5 (83)          | 1 (17)           | 4 (67)        | 1 (17)          |
| Other haematological                                      | 36          | 32          | 7 (22)         | 12 (37)       | 8 (25)          | 5 (16)          | 4 (12)          | 26 (81)         | 9 (28)           | -             | 8 (22)          |
| Other solid tumours                                       | 68          | 63          | 5 (8)          | 5 (8)         | 10 (16)         | 15 (24)         | 36 (57)         | 17 (27)         | 48 (76)          | -             | 12 (18)         |
| <b>Therapies-cancer type pairs</b>                        | <b>625</b>  | <b>551</b>  | <b>66 (12)</b> | <b>45 (8)</b> | <b>85 (15)</b>  | <b>110 (20)</b> | <b>333 (60)</b> | <b>173 (31)</b> | <b>417 (76)</b>  | <b>20 (3)</b> | <b>170 (27)</b> |
| <b>All biomarker alteration-cancer types</b>              | <b>1329</b> | <b>985</b>  | <b>57 (6)</b>  | <b>66 (7)</b> | <b>255 (26)</b> | <b>209 (21)</b> | <b>545 (55)</b> | <b>328 (33)</b> | <b>718 (73)</b>  | <b>47 (4)</b> | <b>453 (34)</b> |
| <b>Unique triplets</b>                                    | <b>2810</b> | <b>1754</b> | <b>109 (6)</b> | <b>86 (5)</b> | <b>389 (22)</b> | <b>303 (17)</b> | <b>884 (50)</b> | <b>577 (33)</b> | <b>1182 (67)</b> | <b>95 (3)</b> | <b>968 (34)</b> |

From A total of 345 therapies received Tiers 1-4 designation, 130 therapies (38%, including both drug and drug combinations) had standard-of-care indications (T1/T2), whereas 271 (79%) therapies were designated investigational tiers (T3/T4). For 56 standard-of-care therapies (of 130, 43%), there are also curated entries in T3/4 categories. NB: (\*) percentages listed in Tiers 1, 1B, 2, 3, 4 have denominator of a total of Tiers 1-4 therapies (†) percentages listed in Tiers R1 and R2 references to denominator that includes all entries (include T1-4, R1/2). Percentage may not add up to 100% as a biomarker, cancer type, or therapy may appear in more than one tier. Abbreviation: GOJ: gastroesophageal junction; NSCLC: non-small cell lung cancer.

**Supplementary Table 3.** Comparison of curated contents in TOPOGRAPH with other public knowledge bases with respect to *ERBB2* A775\_G776insYVMA in non-small cell lung cancer.

| Knowledgebase | Focus of curation,<br>Tiering / LOE<br>scale | Curated therapies<br>(including combinations) |                                                                                       | Therapies where the index mutation is<br>associated with the highest tier/LOE |                                  |
|---------------|----------------------------------------------|-----------------------------------------------|---------------------------------------------------------------------------------------|-------------------------------------------------------------------------------|----------------------------------|
|               |                                              | N                                             | List                                                                                  | Sensitising                                                                   | Resistant                        |
| TOPOGRAPH     | Therapy                                      | 6                                             | AFA, DAC, NER,<br>POZ, PYR, T-DM1                                                     | T-DM1 (3)<br>PYR (3)<br>POZ (3)                                               | AFA (R2)<br>DAC (R2)<br>NER (R2) |
| CIViC         | Variant                                      | 4                                             | AFA, DAC, Sirolimus,<br>T-DM1                                                         | T-DM1 (Level C)<br>AFA (Level C)                                              | DAC (Level B)                    |
| CGI           | Variant                                      | 2                                             | NER, T-DM1                                                                            | T-DM1, NER                                                                    | None                             |
| JAX-CKB       | Not assessable <sup>1</sup>                  | 13                                            | AFA, DAC, ERL, GEF,<br>NER, POZ, PYR, T-<br>DM1, T-DM1 + POZ,<br>TRA +/- chemotherapy | DAC (“Phase II”)<br>POZ (“Phase II”)<br>PYR (“Phase II”)                      | AFA, DAC, ERL,<br>NER, GEF       |
| OncoKB        | Variant                                      | 2                                             | Neratinib, T-DM1                                                                      | T-DM1 (LOE 2)                                                                 | None                             |

All databases were accessed on 08 March 2021. Notes: 1) JAX-CKB reported a “25-tier ranking system” but not presented in the associated publication. The assumption made using highest tier. Abbreviations: AFA: Afatinib; DAC: Dacomitinib; ERL: Erlotinib; GEF: Gefitinib; LOE: level of evidence; NER: Neratinib; POZ: Poziotinib; PYR: Pyrotinib; TRA: Trastuzumab; T-DM1: Ado-Trastuzumab Emtansine.
